# Supplementary material
Source: publisher figshare collection journal article supplement (https://acs.figshare.com/ndownloader/files/4278256)
Supplement: Supplementary file 1 [file 4278256]

# Supporting Information for

## Visualising diastereomeric interactions of chiral amine-chiral copper

### Salen adducts by EPR spectroscopy and DFT.

*Damien M. Murphy,<sup>1</sup> Ignacio Caretti,<sup>2</sup> Emma Carter,<sup>1</sup> Ian A. Fallis,<sup>1</sup>*

*Marcus C. Göbel,<sup>1</sup> James Landon,<sup>1</sup> Sabine Van Doorslaer,<sup>2</sup> David J. Willock,<sup>1</sup>*

<sup>1</sup>School of Chemistry, Cardiff University, Main Building, Park Place, Cardiff CF10 3AT, UK and <sup>2</sup>SIBAC laboratory – Department of Physics, University of Antwerp, Universiteitsplein 1, B-2610 Wilrijk, Belgium.

#### TABLE OF CONTENTS

|                                                                               | PAGE |
|-------------------------------------------------------------------------------|------|
| (1) Further Experimental Details.                                             | S2   |
| (2) X-band EPR spectra of [Cu(2)] in MBA.                                     | S4   |
| (3) Determination coordination number of MBA molecules                        | S5   |
| (4) Supporting <sup>1</sup> H and <sup>14</sup> N CW and Davies ENDOR spectra | S8   |
| (5) HYSCORE spectra                                                           | S17  |
| (6) Additional DFT details                                                    | S18  |

## (1) Further Experimental Details:

### *Preparation of samples for the EPR measurements*

***X-/Q-band CW-EPR/ENDOR:*** For CW-EPR/ENDOR measurements, a 1 ml volumetric stock solution of [Cu(**1,2**)] (0.100 g, 0.16 mmol) in dichloromethane was prepared and 200  $\mu$ l (Hamilton glass microsyringes) aliquots of this solution were placed in 2 ml vials. The vials were placed in a heating block at 50°C and evaporated to dryness under a slow stream of nitrogen to afford [Cu(**1,2**)] as a purple glass. The vials were allowed to cool and to each 115  $\mu$ l of dichloromethane and 115  $\mu$ l of toluene was added to afford a high quality frozen solution. A number of additional EPR experiments were also performed (under similar conditions) using racemic (or enantiomeric *R*-, *S*-) methylbenzylamine (MBA). In the presence of amine, the parent complex was dissolved in 100  $\mu$ l of dichloromethane and 100  $\mu$ l of amine, with a small amount (30  $\mu$ L) of toluene added to aid glass formation. The sample volume used in X-band EPR measurements was 150  $\mu$ L, whereas 20  $\mu$ L sample volume was used in Q-band ENDOR measurements.

***W-band CW and pulsed EPR:*** First, a 32mM stock solution was prepared by dissolving the *R,R* or *S,S* form of the copper complex under study (Cu[**1**] or Cu[**2**]) in 1ml of dichloromethane. Then, 100 $\mu$ l aliquots of this solution were placed in 4ml vials and evaporated to dryness at 50°C under nitrogen atmosphere inside a glovebox. Finally, 230 $\mu$ l of toluene (in case of Cu[**1**]) or dichloromethane (in case of Cu[**2**]) was added to the vials. To study amine coordination, 200 $\mu$ l of either *R,S*- or *rac*-methylbenzylamine (MBA) was added together with 30 $\mu$ l of toluene.

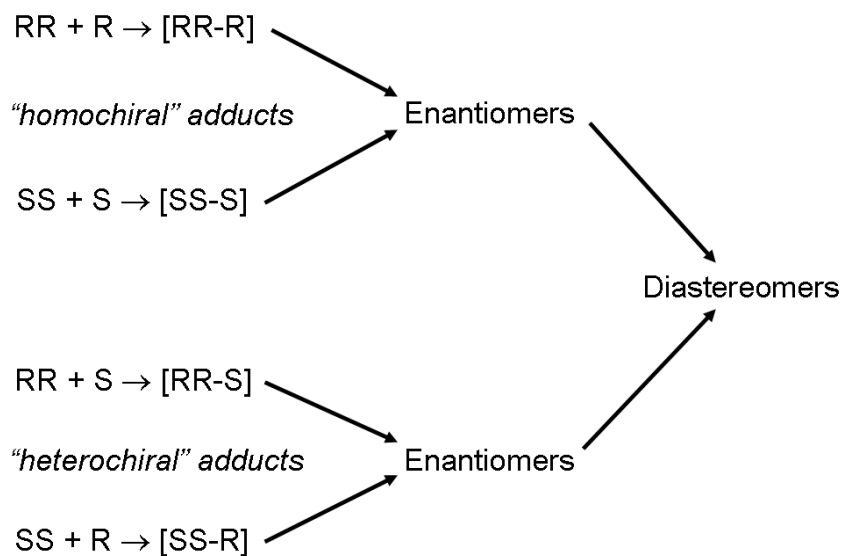

**Scheme S1:** Summary of the configurational stereoisomers examined: **RR** = *R,R*-[Cu(**1,2**)], **SS** = *S,S*-[Cu(**1,2**)], **R** = *R*-MBA, **S** = *S*-MBA. [**RR-R**] therefore represents the specific complex-amine adduct of *R,R*-[Cu(**1,2**)] + *R*-MBA.

## (2) X-band EPR spectra of [Cu(2)] in MBA

**Figure S1:** X-band CW-EPR spectra recorded at 140K of (a) the non-coordinated [Cu(2)] complex in toluene:dichloromethane together with the different [Cu(2)]-MBA combinations of (b) *rac-rac*, (c) *RR-S*, (d) *SS-R*, (e) *RR-R* and (f) *SS-S*.

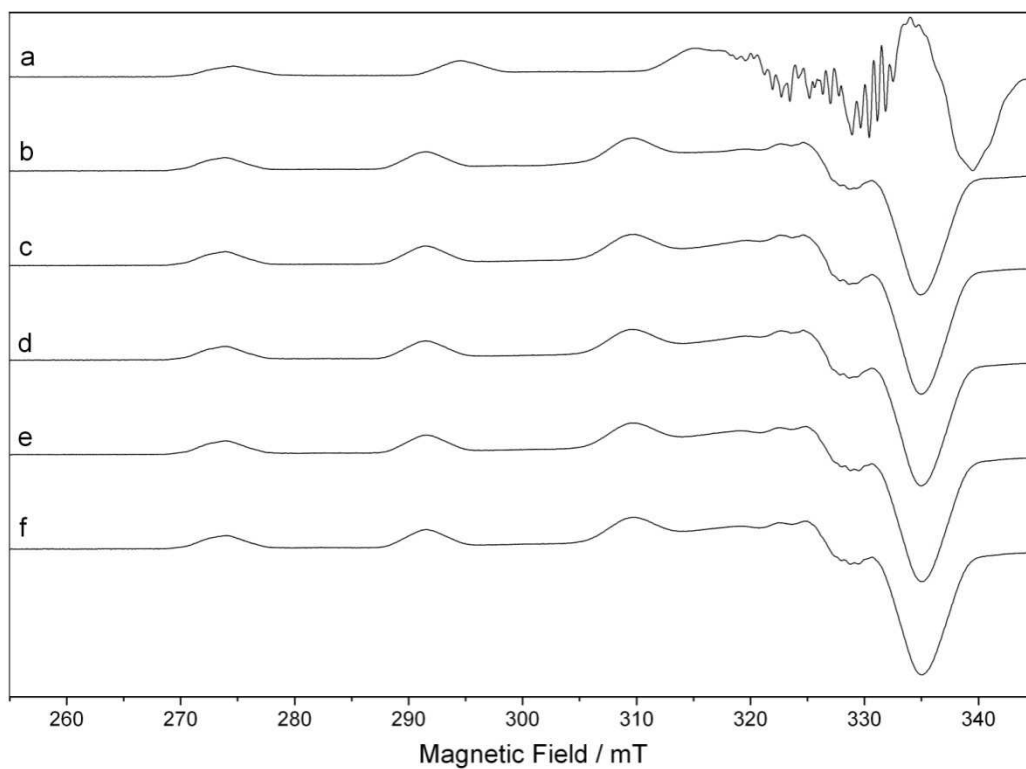

The equivalent series of spectra for [Cu(1)] were given in Fig.1 of main paper.

### (3) Determination of the number of coordinated MBA molecules ( $n$ ) to [Cu(1)]

A series of *rac-rac* samples, i.e., [Cu(1)]+MBA, were prepared using a constant concentration of [Cu(1)] ( $c = 3.3205 \text{ mmol dm}^{-3}$ ) and the ratio of MBA was varied from 1 to 20. The solvent used throughout was toluene. The resulting EPR spectra are shown in Fig.S2 below. For comparison, the EPR spectra of [Cu(1)] recorded in neat toluene (no amine; blue trace) and in an excess of amine (1:1200; red trace) are also shown.

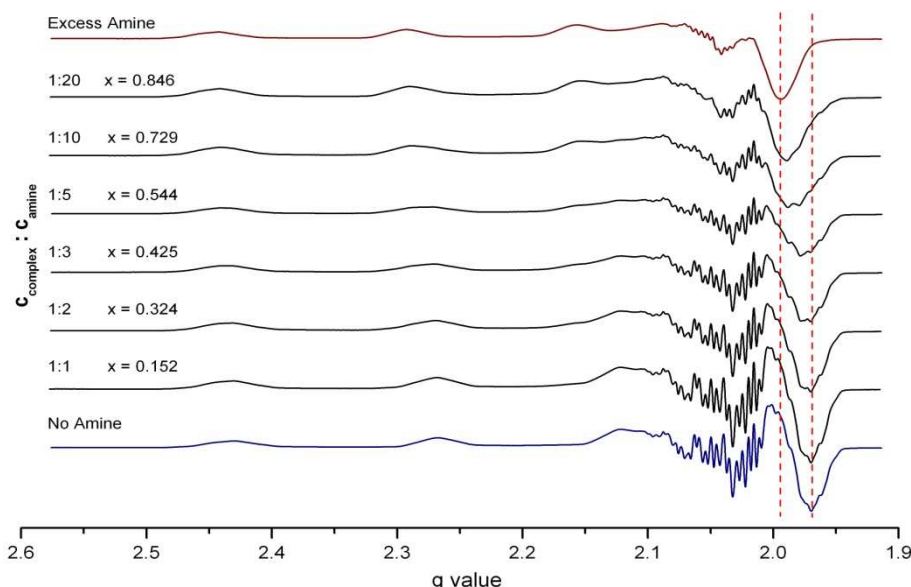

**Figure S2:** X-band CW-EPR spectra recorded at 130K of *rac*-[Cu(1)] dissolved in toluene with increasing concentrations of *rac*-MBA.

The spectra in Fig.S2 can be seen to progressively shift from the extreme cases of *no-amine present*, a typical non-coordinated spectrum (blue trace), to the *excess amine* case giving a coordinated spectrum (red trace). These shifts are most notable in the overshoot region of the spectra. The intervening EPR spectra (with Cu:MBA ratios ranging from 1:1 to 1:20) can then be treated as a linear combination of the blue and red base spectra. These intervening spectra were thus fitted using an algorithm based on combinations of red and blue spectra giving the coefficient  $x$  (the ratio of bound to unbound MBA): as expected  $x$  increases as the amount of MBA increases (Fig.S3). The data can then be analysed as follows to find  $n$  (the number of coordinated MBA's):

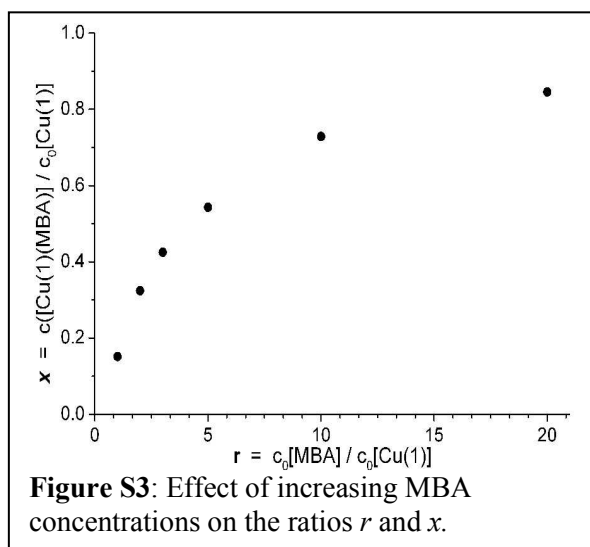

The equilibrium for MBA binding can be written as:

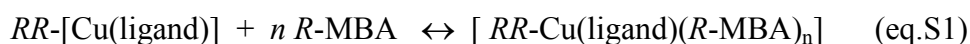

$$K = \frac{c([Cu(ligand)(MBA)_n])}{c([Cu(ligand)]) \cdot c(MBA)^n} \quad (\text{eq.S2})$$

Where  $Cu(ligand)$  represents either Cu(1) or Cu(2). If  $r$  represents the Cu:MBA ratio and  $c_0$  the initial concentration, then:

$$c_0(MBA) = r \cdot c_0([Cu(ligand)]) \quad (\text{eq.S3})$$

and

$$c([Cu(ligand)(MBA)_n]) = x \cdot c_0([Cu(ligand)]) \quad (\text{eq.S4})$$

Therefore, the amount of non-coordinated MBA in the solution is given as:

$$\begin{aligned} c(MBA) &= c_0(MBA) - n \cdot c([Cu(ligand)(MBA)_n]) \\ c(MBA) &= r \cdot c_0([Cu(ligand)]) - n \cdot x \cdot c_0([Cu(ligand)]) \quad (\text{eq.S5}) \\ c(MBA) &= (r - n \cdot x) \cdot c_0([Cu(ligand)]) \end{aligned}$$

while the amount of non-coordinated Cu(ligand) is given as:

$$\begin{aligned} c([Cu(ligand)]) &= c_0([Cu(ligand)]) - c([Cu(ligand)(MBA)_n]) \quad (\text{eq.S6}) \\ c([Cu(ligand)]) &= (1 - x) \cdot c_0([Cu(ligand)]) \end{aligned}$$

Inserting eq.S5 and S6 into S2 gives:

$$K = \frac{x \cdot c_0([Cu(ligand)])}{(1 - x) \cdot c_0([Cu(ligand)]) \cdot ((r - n \cdot x) \cdot c_0([Cu(ligand)]))^n} \quad (\text{eq.S7})$$

$$K = \frac{x}{1 - x} \cdot ((r - n \cdot x) \cdot c_0([Cu(ligand)]))^{-n} \quad (\text{eq.S8})$$

$$\frac{x}{1 - x} = K \cdot ((r - n \cdot x) \cdot c_0([Cu(ligand)]))^n \quad (\text{eq.S9})$$

$$\begin{aligned} \ln\left(\frac{x}{1 - x}\right) &= \ln(K) + n \cdot \ln(r - n \cdot x) + n \cdot \ln(c_0([Cu(ligand)])) \\ A &= \ln(K) + n \cdot \ln(c_0([Cu(ligand)])) \\ \ln\left(\frac{x}{1 - x}\right) &= n \cdot \ln(r - n \cdot x) + A \quad (\text{eq.S10}) \end{aligned}$$

Since  $r$  ranges from 1 to 20 and is much larger than  $x$  (ranges from 0 to 1), the following simplification may be implemented:

$$\begin{aligned} r &\gg x \\ n &\in \{1, 2\} \\ r - n \cdot x &\approx r - x \end{aligned} \quad (\text{eq.S11})$$

Hence:

$$\ln\left(\frac{x}{1 - x}\right) \approx n \cdot \ln(r - x) + A \quad (\text{eq.S11})$$

Thus a plot of  $\ln(x/1-x)$  against  $\ln(r-x)$  should give a straight line of slope  $n$ . The resulting graph is shown in Fig. S4 with  $n = 1.04 \pm 0.15$ .

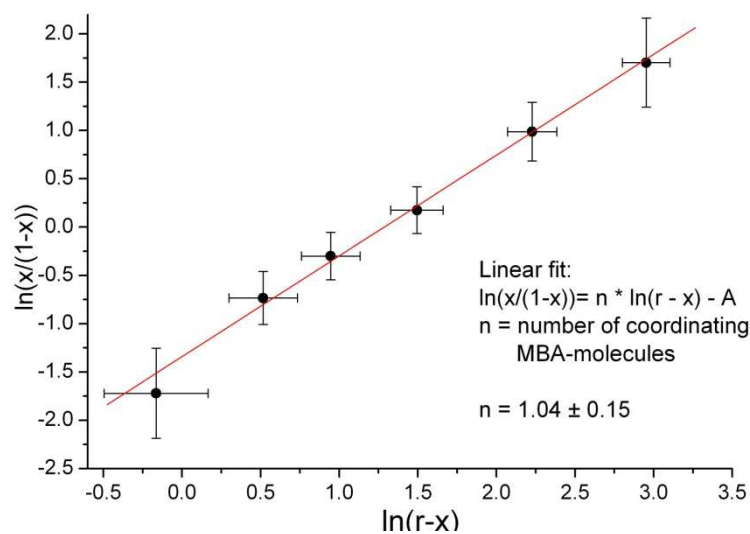

**Figure S4:** Plot of  $\ln(x/(1-x))$  against  $\ln(r-x)$  for the determination of  $n$ , the number of coordinated MBA molecules in the [Cu(**1**)] complex.

Thus we can conclude that only 1 MBA molecule coordinates to [Cu(**1**)]. A similar treatment was also performed for [Cu(**2**)], where  $n = 1$  was also found. These results are expected for such as bulky square planar Cu-salen complex interacting with a bulky MBA substrate.

#### (4) Supporting $^1\text{H}$ and $^{14}\text{N}$ ENDOR spectra

**Figure S5;** Q-band  $^1\text{H}$  CW-ENDOR spectra (recorded at 10K) showing the  $\text{H}^{\text{imine}}$  couplings of (a) *rac*-[Cu(1)] dissolved in  $\text{d}^8$ -toluene/ $\text{d}^6$ -dichloromethane, and (b) *SS-R*, (c) *RR-S*, (d) *SS-S* and (e) *RR-R*. Spectra recorded at  $g = g_{\parallel} = g_3$  and  $g = g_{\perp} = (g_1 + g_2)/2$ . For clarity, the central part of the spectra, containing proton couplings from the remaining ligand nuclei and coordinated MBA, have been removed.

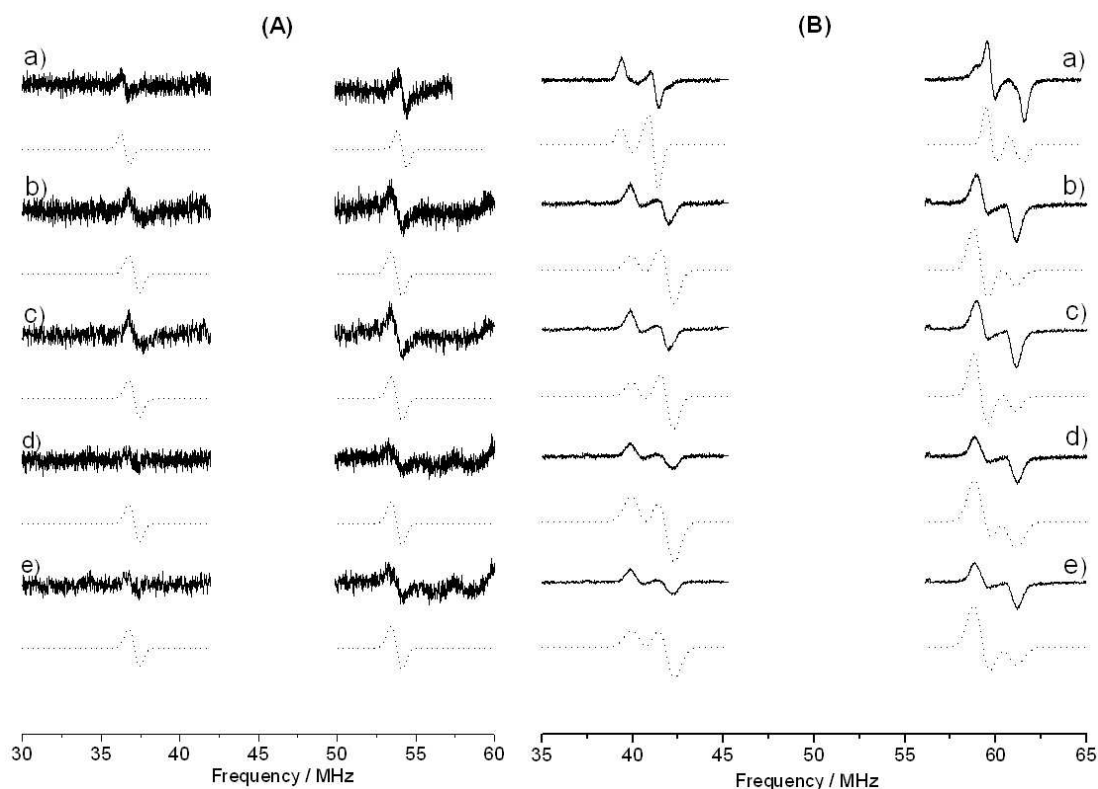

The equivalent series of spectra for the [Cu(2)] complex were given in Fig.4 of the main paper.



**Table 1;**  $^1\text{H}$  principal hyperfine values for  $R,R$ -[Cu(**1**)] and  $R,R$ -[Cu(**2**)] dissolved in toluene/dichloromethane or MBA. For comparison the ENDOR data for the structurally related [Cu(Salen)] complex<sup>(42)</sup> is also shown.

| Proton                                                                          | $A_1$ /<br>MHz | $A_2$ /<br>MHz | $A_3$ /<br>MHz | $a_{\text{iso}}$ /<br>MHz | $^{(c)}\theta_{\text{H}}$ / ° | $A_{\text{dipolar}}$ /<br>MHz | R / Å        |              |
|---------------------------------------------------------------------------------|----------------|----------------|----------------|---------------------------|-------------------------------|-------------------------------|--------------|--------------|
| <b>Single Crystal</b> <sup>(41)</sup>                                           |                |                |                |                           |                               |                               | ENDOR        | X-ray        |
| $^{(a)}[\text{Cu}(\text{Salen})] - \text{H}^{\text{imine}}$                     | 18.43<br>18.64 | 19.38<br>19.45 | 22.80<br>23.62 | 20.22<br>20.57            | 90                            |                               | 3.97<br>3.76 | 3.78<br>3.73 |
| $^{(a)}[\text{Cu}(\text{Salen})] - \text{H}^{\text{methine}}$                   | -1.43<br>-3.47 | -1.43<br>-0.90 | 5.54<br>5.13   | 0.90<br>0.76              | 90                            |                               | 3.30<br>3.37 | 3.19<br>3.36 |
|                                                                                 |                |                |                |                           |                               |                               |              |              |
| <b><sup>(b)</sup>tol/dcm</b>                                                    |                |                |                |                           |                               |                               |              |              |
| [Cu( <b>1</b> )] - $\text{H}^{\text{methine}}$                                  | -1.41          | -1.43          | 5.54           | 0.91                      | 50                            | 4.63                          | 3.30         |              |
| [Cu( <b>1</b> )] - $\text{H}^{\text{tert-butyl}}$                               | -1.64          | -1.50          | 3.30           | 0.05                      | 70                            | 3.25                          | 3.69         |              |
| [Cu( <b>1</b> )] - $\text{H}^{\text{imine}}$                                    | 18.5           | 17.2           | 22.1           | 19.27                     | 90                            | 2.83                          | 3.84         |              |
| [Cu( <b>2</b> )] - $\text{H}^{\text{imine}}$                                    | 18.4           | 17.7           | 22.45          | 19.52                     | 90                            | 2.93                          | 3.80         |              |
|                                                                                 |                |                |                |                           |                               |                               |              |              |
| <b><sup>(b)</sup>MBA</b>                                                        |                |                |                |                           |                               |                               |              |              |
| [Cu( <b>1</b> )] - $\text{H}^{\text{imine}}$                                    | 17.2           | 16.6           | 21.0           | 18.26                     | 90                            | 2.73                          | 3.90         |              |
| [Cu( <b>2</b> )] - $\text{H}_a^{\text{imine}}$<br>- $\text{H}_b^{\text{imine}}$ | 16.6           | 17.2           | 21.3           | 18.37                     | 90                            | 2.93                          | 3.81         |              |
|                                                                                 | 16.6           | 16.1           | 21.3           | 18.00                     | 90                            | 3.30                          | 3.66         |              |
| [Cu( <b>1</b> )] - $\text{H}^{\text{NH}_2}$                                     | -2.52          | -4.87          | 3.62           | -1.26                     | 10                            | 4.88                          | 3.22         |              |
| [Cu( <b>2</b> )] - $\text{H}^{\text{NH}_2}$                                     | -2.62          | -5.2           | 3.62           | -1.40                     | 10                            | 5.02                          | 3.18         |              |

<sup>(a)</sup>Two crystallographically distinct sites identified in the single crystal ENDOR spectrum of [Cu(Salen)]. <sup>(b)</sup>The frozen solution ENDOR spectra of [Cu(**1,2**)] were recorded either using toluene/dichloromethane or neat MBA. <sup>(c)</sup> $\theta_{\text{H}}$  is defined as the angle between  $\mathbf{g}_z$  and  $A_3$ .

**Figure S6;** Q-band  $^1\text{H}$  CW-ENDOR spectra (10K) of *rac*-[Cu(1)] dissolved in  $\text{d}^8$ -toluene/ $\text{d}^6$ -dichloromethane, recorded at (a) 1204.6, (b) 1197.7, (c) 1186.2, (d) 1165.7, (e) 1140.5, (f) 1117.7 and (g) 1086.8 mT. (experimental = solid, simulated = dashed line). Only the strongly coupled protons from the methine and *tert*-butyl groups are shown in the simulations (the remaining weak/remote ligand protons responsible for the inner intense peaks were not simulated, as the error in their assignment is significant). \* = *tert*-butyl peak, ■ = methine peak.

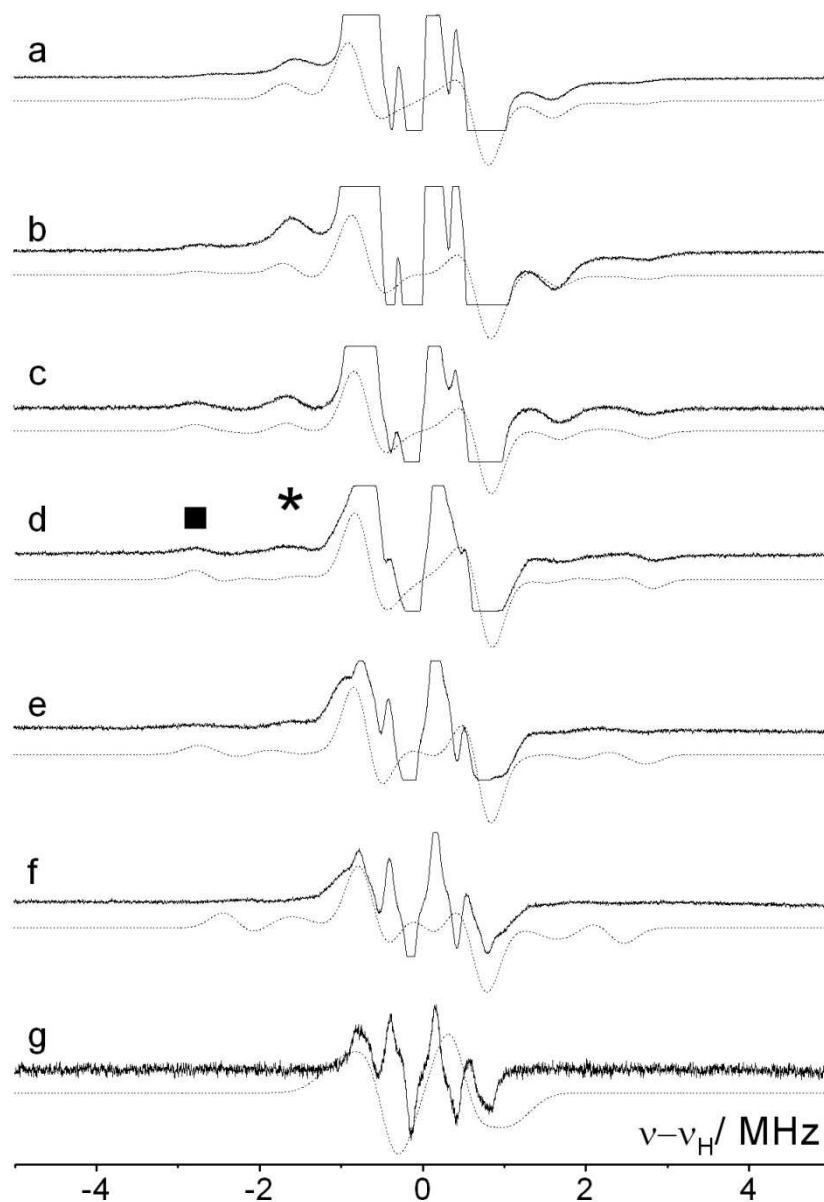

**Figure S7;** X-band  $^1\text{H}$  CW-ENDOR spectra (10K) of (a) *rac*-[Cu(**1**)] and (b) *rac*-[Cu(**2**)] dissolved in  $\text{d}^8$ -toluene/ $\text{d}^6$ -dichloromethane, recorded at the field position corresponding to  $g = g_{\parallel}$ . The absence of the *tert*-butyl peak (\*) in [Cu(**2**)] is very obvious compared to [Cu(**1**)]. The methine protons are present in both samples (■).

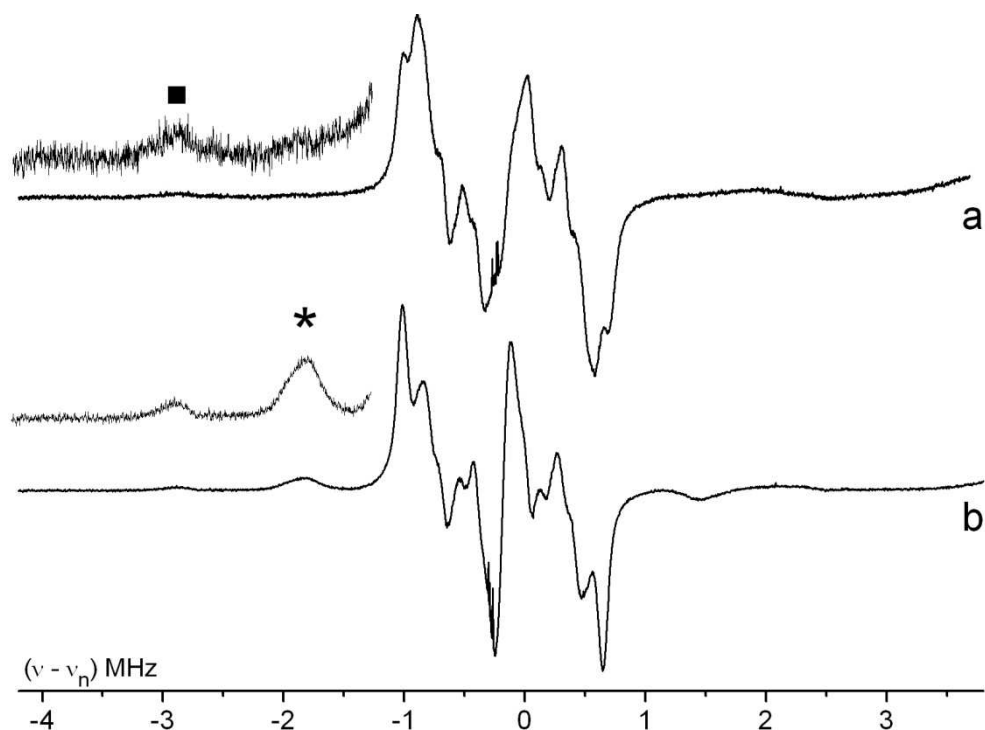

These spectra were used in the identification and assignment of the *tert*-butyl groups in [Cu(**1**)].

**Figure S8:** X-band Davies ENDOR spectra (recorded at 10K) of *rac*-[Cu(**1**)] dissolved in d<sup>8</sup>-toluene/d<sup>6</sup>-dichloromethane, recorded at the field positions (a) 340.0, (b) 333.0, (c) 327.0, (d) 320.6, (e) 310.0, (f) 300.0 and (g) 290.0 mT (experimental = solid, simulated = dashed line). Only the peaks for the methine and *tert*-butyl protons are included in the simulations.

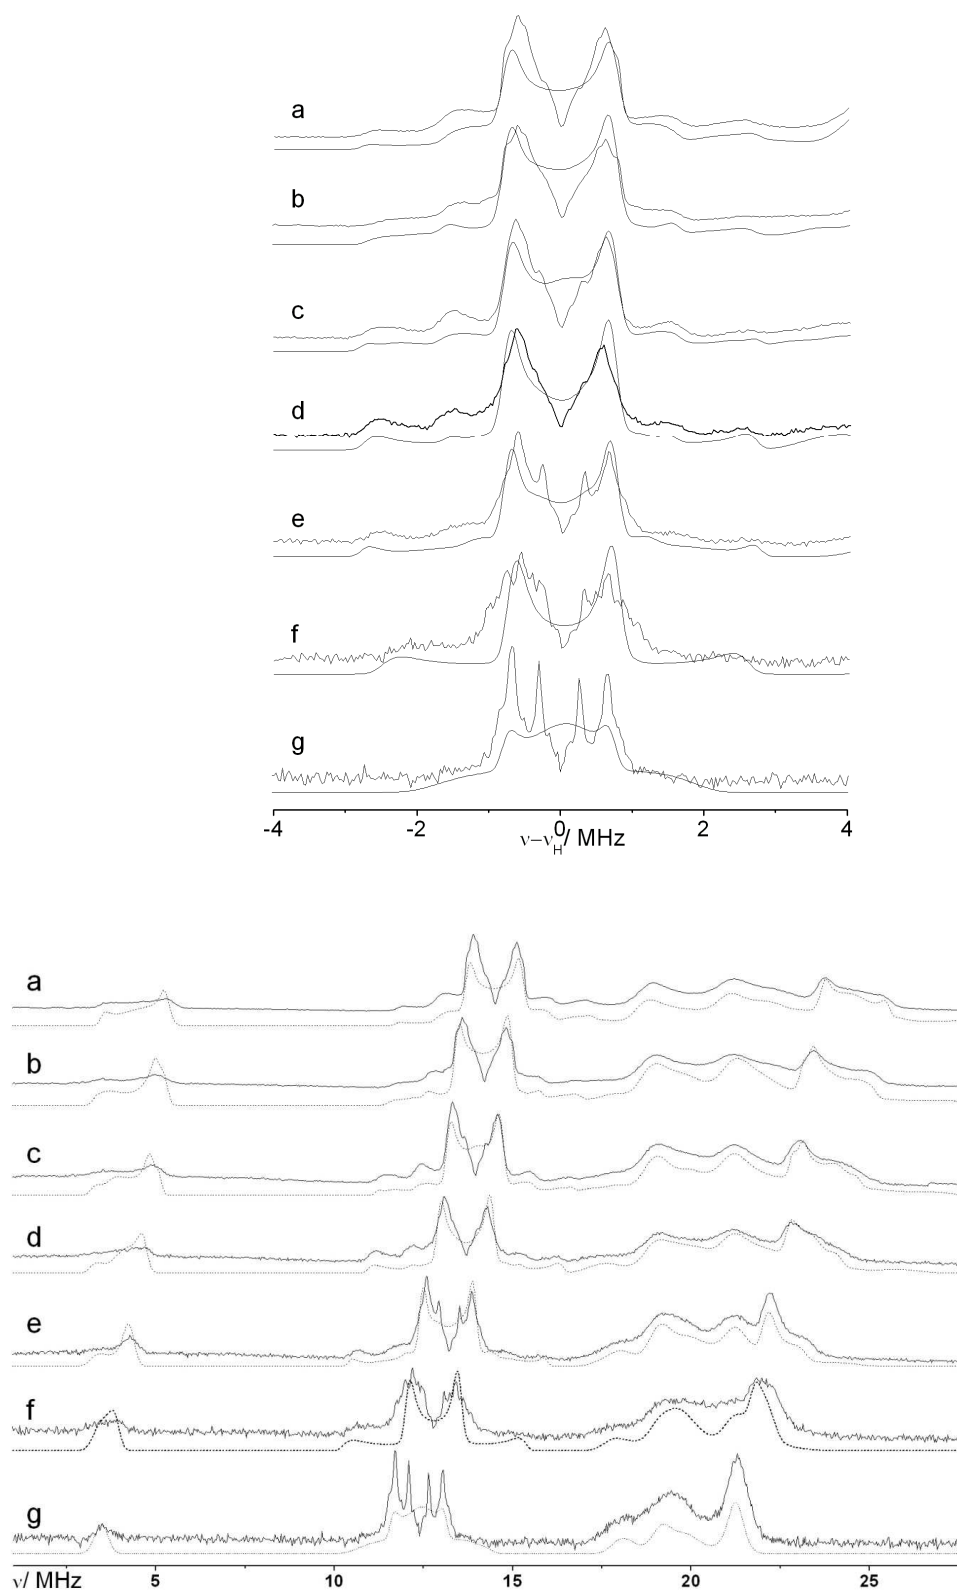

**Figure S9:** Q-band CW  $^1\text{H}$  ENDOR spectra of *rac*-[Cu(**1**)] dissolved in *rac*-MBA recorded at the field positions of (a) 1191.0 (b) 1188.8 (c) 1171.7 (d) 1125.0 and (e) 1069.0 mT (experimental = solid, simulated = dashed line). The peaks labelled \* are due to the ligand methine protons. Only the peaks for the amine protons are included in the simulations.

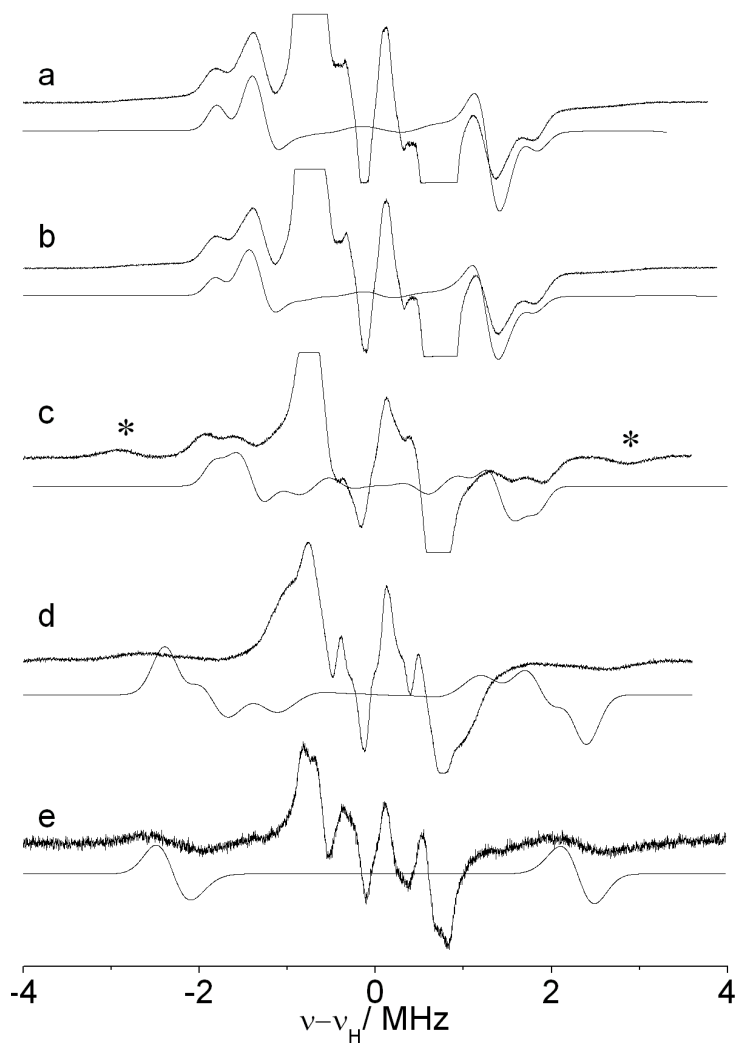

**Figure S10;** Q-band CW- $^1\text{H}$  ENDOR spectra of *rac*-[Cu(2)] dissolved in *rac*-MBA recorded at (a) 1201.1, (b) 1191.9, (c) 1186.2, (d) 1142.8, (e) 1101.6 and (f) 1073.1 mT. (experimental = solid, simulated = dashed line).

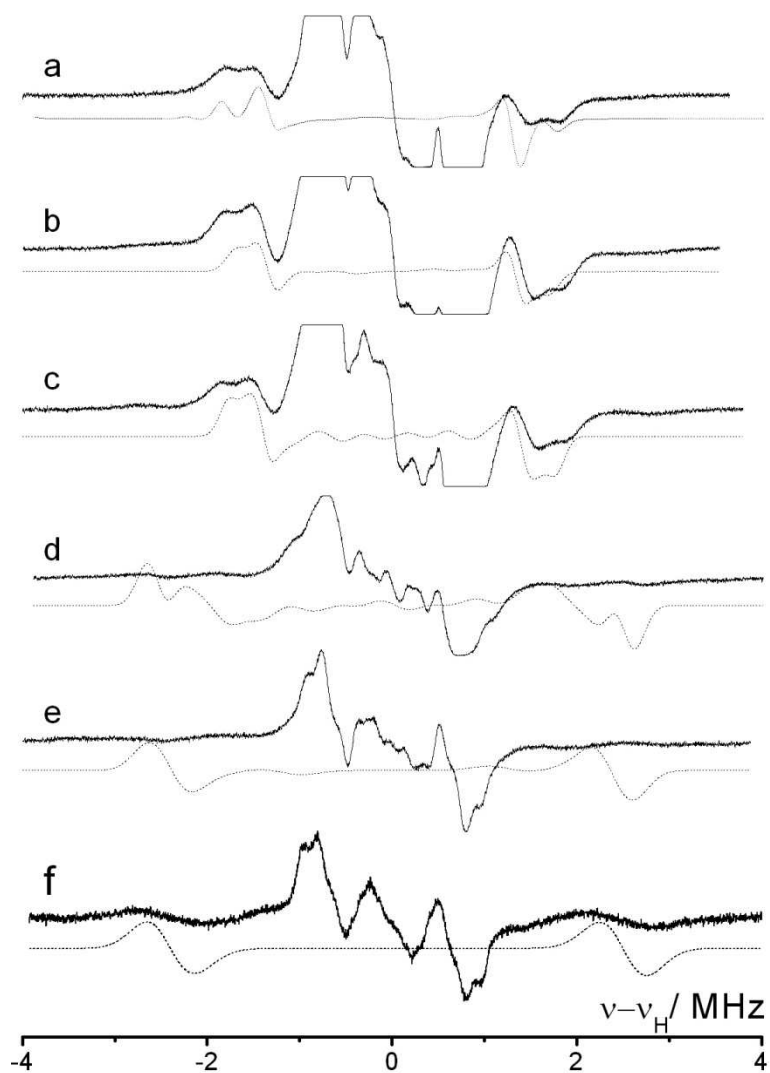

**Figure S11;** Q-band  $^1\text{H}$  CW-ENDOR spectra (recorded at 10K) of *rac*-[Cu(**1**)] dissolved in  $\text{d}^8$ -toluene/ $\text{d}^6$ -dichloromethane, (b) *rac*-[Cu(**1**)] in *racemic*  $\text{d}^2$ -MBA, and (c) *rac*-[Cu(**1**)] in *rac*-MBA (protic). Spectra recorded at  $g = g_{\parallel} = g_3$  and  $g = g_{\perp} = (g_1 + g_2)/2$ .

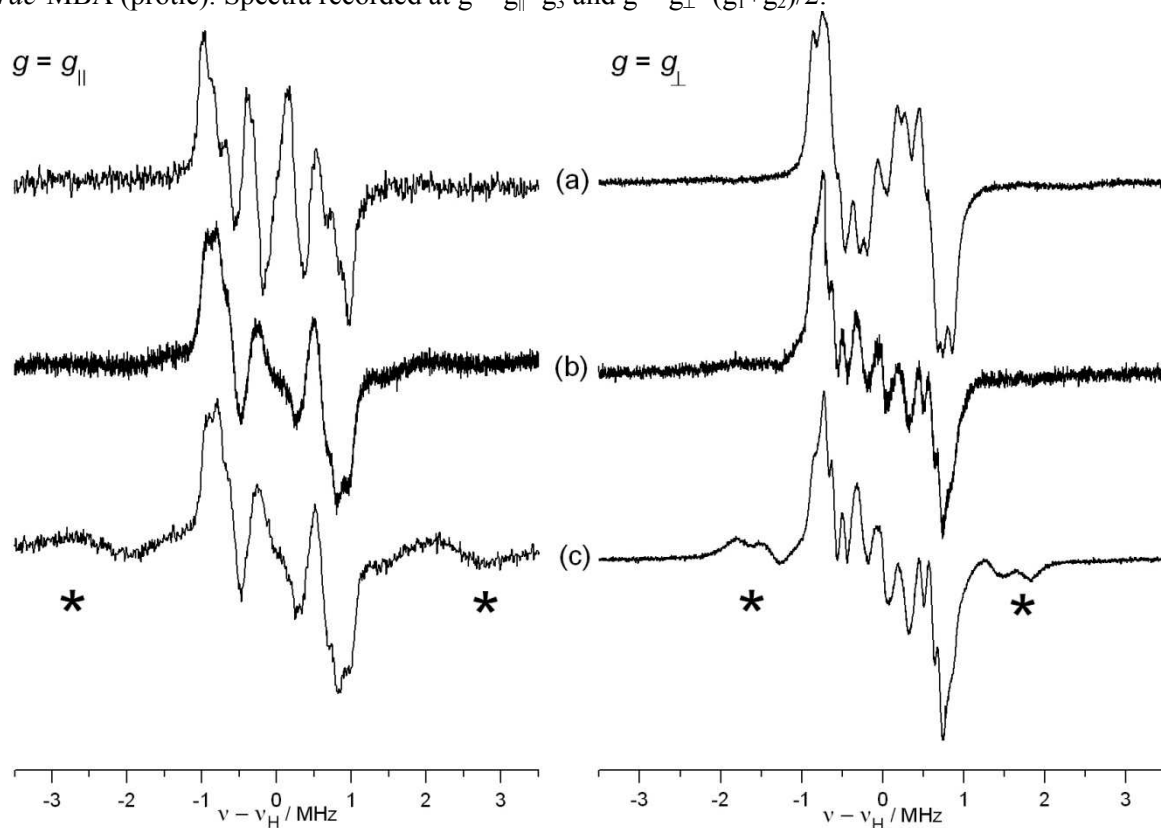

The  $-\text{NH}_2$  protons from the coordinated MBA are labelled \* in the Figure. These are clearly visible in (c), obtained using protic MBA, but largely absent in (b), recorded using  $\text{d}^2$  deuterated-MBA. (Note; deuteration of MBA by  $\text{D}_2\text{O}$  does not give 100% exchange, hence the presence of residual MBA- $\text{NH}_2$  proton peaks in (b).)

**Figure S12;** Q-band  $^{14}\text{N}$  CW-ENDOR spectra of  $[\text{Cu}(\mathbf{1})]$  dissolved in (a,b) toluene and (c,d) MBA respectively. The spectra were recorded at the field positions (a,c)  $g = g_{\perp}$  and (b,d)  $g = g_{\parallel}$ . Solid lines = experimental, dashed lines = simulated.

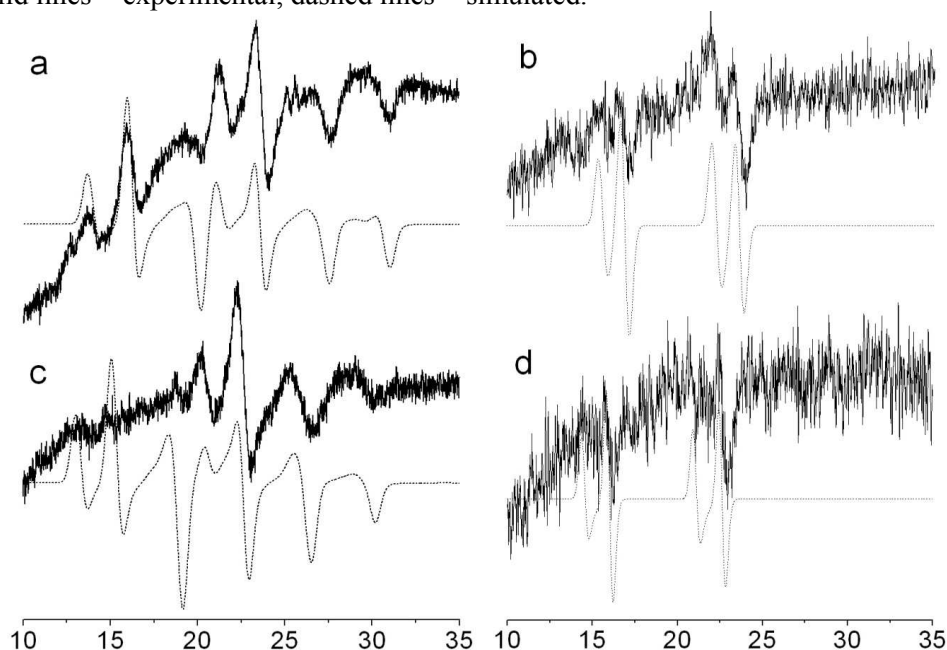

**Figure S13:** Q-band  $^{14}\text{N}$  CW ENDOR spectra of  $[\text{Cu}(\mathbf{2})]$  dissolved in (a,b) toluene and (c,d) MBA respectively. The spectra were recorded at the field positions (a,c)  $g = g_{\perp}$  and (b,d)  $g = g_{\parallel}$ . Solid lines = experimental, dashed lines = simulated.

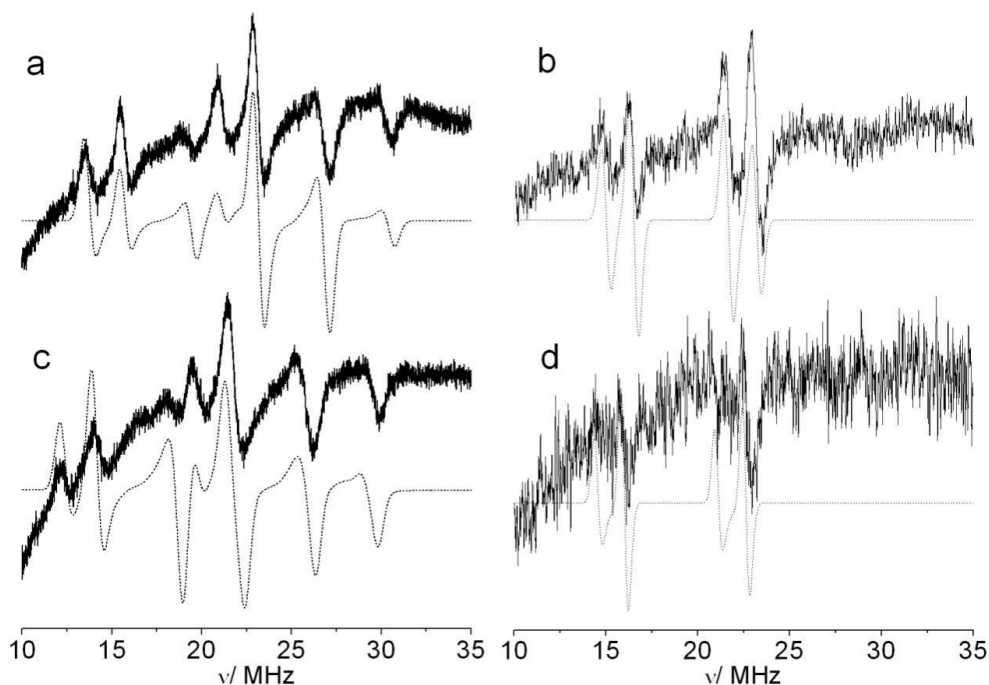

NOTE: simulations assuming the contributions of both nitrogen nuclei (with the hyperfine tensor in-plane rotated over  $90^\circ$ ) are identical to those assuming only one nitrogen, because of the near axially of the  $g$  tensor.



## (5) HYSCORE spectra

**Figure S14:** X-band HYSCORE spectra of *S,S*-[Cu(**1**)] dissolved in (a) toluene, (b) *R*-MBA and (c) pyridine, recorded at 15K around the  $g = g_{\perp}$  field position (340 mT) with  $\tau = 96$  ns and  $\tau = 176$  ns. (d) Simulation of spectrum (b) showing the weak interaction of the amine  $^{14}\text{N}$  with [Cu(**1**)] (see text for parameters).

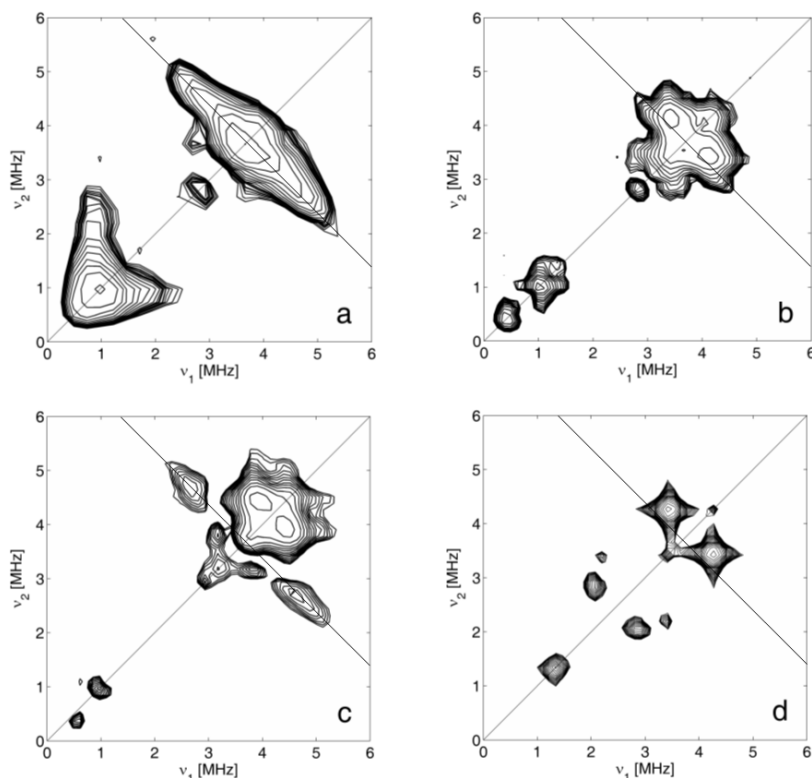

This Figure (a) shows the low-frequency region of the HYSCORE spectrum of [Cu(**1**)] in toluene, recorded at  $g = g_{\perp}$ . In the low-field area of the spectrum, a ridge due to interactions with the  $^{13}\text{C}$  nuclei of ligand (**1**) is observed ( $^{13}\text{C}$  in natural abundance). The corresponding HYSCORE spectrum of [Cu(**1**)] in MBA is shown in (b). Two distinct peaks at  $\sim(3.4, 4.2)$  MHz are observed, centred around the  $^{13}\text{C}$  Larmor frequency and could thus stem from nearby  $^{13}\text{C}$  nuclei in altered arrangement. However, in principle, an appropriate combination of  $^{14}\text{N}$  hyperfine and nuclear quadrupole couplings could also lead to double-quantum cross-peaks at this position. To test this, the HYSCORE spectrum of [Cu(**1**)] dissolved in pyridine (Py) was recorded. The  $\text{sp}^2$ -hybridized nitrogen of pyridine is expected to have different nuclear quadrupole values compared to the  $\text{sp}^3$ -hybridized nitrogen of MBA. The resulting HYSCORE spectrum of [Cu(**1**)] in pyridine is given in (c). A clear shift of the double-quantum cross peaks, consistent with a larger nuclear quadrupole coupling of the  $^{14}\text{N}$  nucleus, can be seen. The  $^{13}\text{C}$  ridge found in (a) is now also visible, where earlier it was masked by the intense cross peaks in (b). The HYSCORE spectrum of [Cu(**1**)]+Py therefore proved that the cross peaks observed for [Cu(**1**)]+MBA are indeed due to the weak interaction with the amine nitrogen. The simulated parameters are given in Table 3.

## (6) Additional DFT details

**Figure S15:** The starting model of [Cu(1)]+MBA used in QMMM calculations. *a)* Space fill atoms at QM level (BHandH), stick atoms at MM level (UFF). *b)* The torsion angle,  $\varphi$ , used to scan the orientation of MBA relative to the [Cu(1)] complex; this angle is defined with respect to  $\text{O}(\text{Salen})\cdots\text{Cu}\cdots\text{N}(\text{MBA})\cdots\text{C}^*(\text{MBA})$  where the defining atoms are shown as spheres in *b*).

Thus an angle of  $\varphi = 0^\circ$  is shown in *b*) where the  $\text{C}^*$  (of MBA) atom is above the  $\text{O}$  (of Salen) atom. For clarity, the MBA-phenyl ring is shown oriented away from the complex. Clockwise turn is represented as -ve degrees and anticlockwise as +ve degrees.

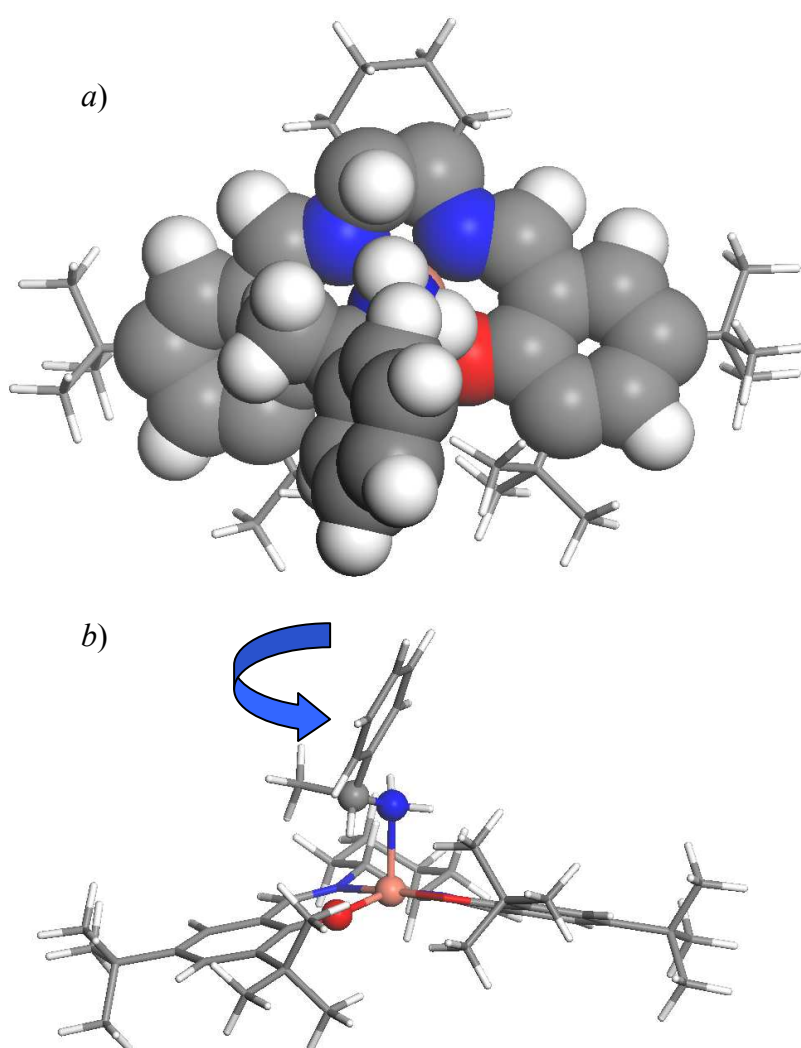

**Figure S16:** The relative energy vs torsion angle,  $\varphi$  (see Figure S15b for definition and value of  $\varphi = 0^\circ$ ) for *R*-MBA with *R,R*-[Cu(1)]. For this scan of the torsion angle Cu...N(MBA) is constrained to 2.2 Å and each point in the plot represents an optimisation with the additional constraint of torsion angle value. Structures from minima **A** and **B** were further optimised without constraints to produce the structures given in Figure 5 (main paper).

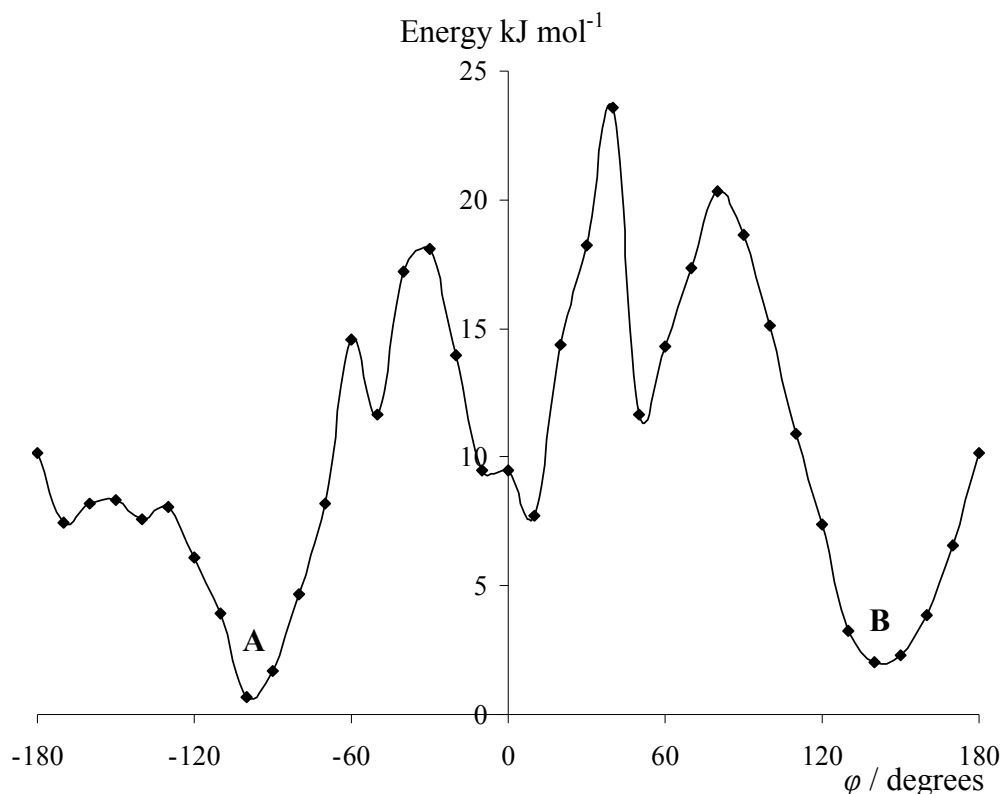

Full author details for reference (32) are:

[32] Gaussian 03, Revision C.02, Frisch, M.J.; Trucks, G.W.; Schlegel, H.B.; Scuseria, G.E.; Robb, M.A.; Cheeseman, J.R.; Montgomery, Jr. J.A.; Vreven, T.; Kudin, K.N.; Burant, J.C.; Millam, J.M.; Iyengar, S.S.; Tomasi, T.; Barone, V.; Mennucci, B.; Cossi, M.; Scalmani, G.; Rega, N.; Petersson, G.A.; Nakatsuji, H.; Hada, M.; Ehara, M.; Toyota, K.; Fukuda, R.; Hasegawa, J.; Ishida, M.; Nakajima, T.; Honda, T.; Kitao, O.; Nakai, H.; Klene, M.; Li, X.; Knox, J.E.; Hratchian, H.P.; Cross, J.B.; Bakken, V.; Adamo, C.; Jaramillo, J.; Gomperts, R.; Stratmann, R.E.; Yazyev, O.; Austin, A.J.; Cammi, R.; Pomelli, C.; Ochterski, J.W.; Ayala, P.Y.; Morokuma, K.; Koth, J.; Salvador, P.; Dannenberg, J.J.; Zakrzewski, V.G.; Dapprich, S.; Daniels, A.D.; Strain, M.C.; Farkas, O.; Malick, D.K.; Rabuck, A.D.; Raghavachari, K.; Foresman, J.B.; Ortiz, J.V.; Cui, Q.; Baboul, A.G.; Clifford, S.; Cioslowski, J.; Stefanov, B.B.; Liu, G.; Liashenko, A.; Piskorz, P.; Komaromi, I.; Martin, R.L.; Fox, D.J.; Keith, T.; Al-Laham, M.A.; Peng, C.Y.; Nanayakkara, A.; Hallacomb, M.; Gill, P.M.W.; Johnson, B.; Chen, W.; Wong, M.W.; Gonzalez, C. and Pople, J.A.; Gaussian, Inc., Wallingford CT, **2004**.
